# Supplementary material
Source: PubMed Central journal article supplement (PMC4902575)
Supplement: supp_pp.15.01531_01531Supp_Figure1.pdf [file supp_pp.15.01531_01531Supp_Figure1.pdf]

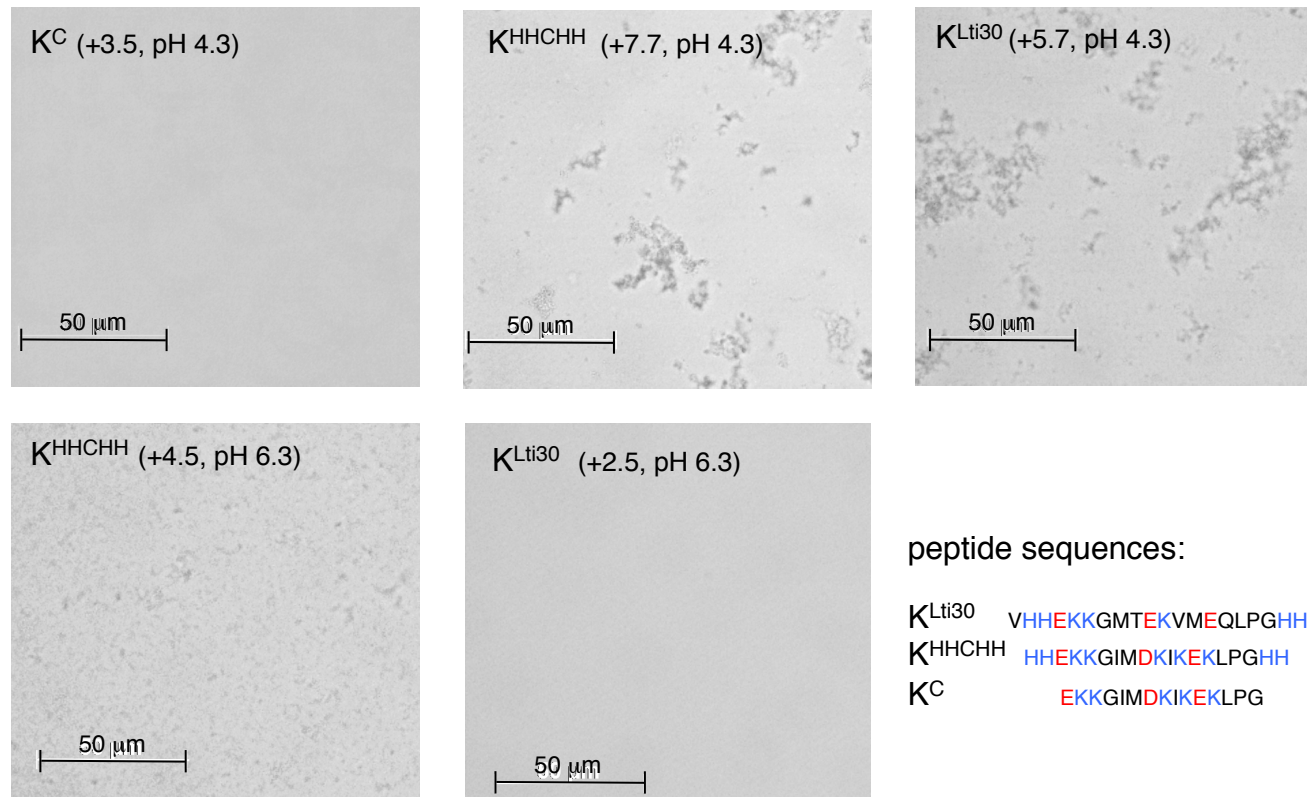

**Supplementary Figure 1.** Light-microscopy analysis showing that vesicle clustering by different K-segments follows pH and thus peptide net charge. Peptide concentration 0.7  $\mu$ M in 1.4 mM PC:PG vesicles at 1:3 ratio.
