# Supplementary material
Source: PubMed Central journal article supplement (PMC4902575)
Supplement: supp_pp.15.01531_PP2015-01531R2_Supplemental_figure2.pdf [file supp_pp.15.01531_PP2015-01531R2_Supplemental_figure2.pdf]

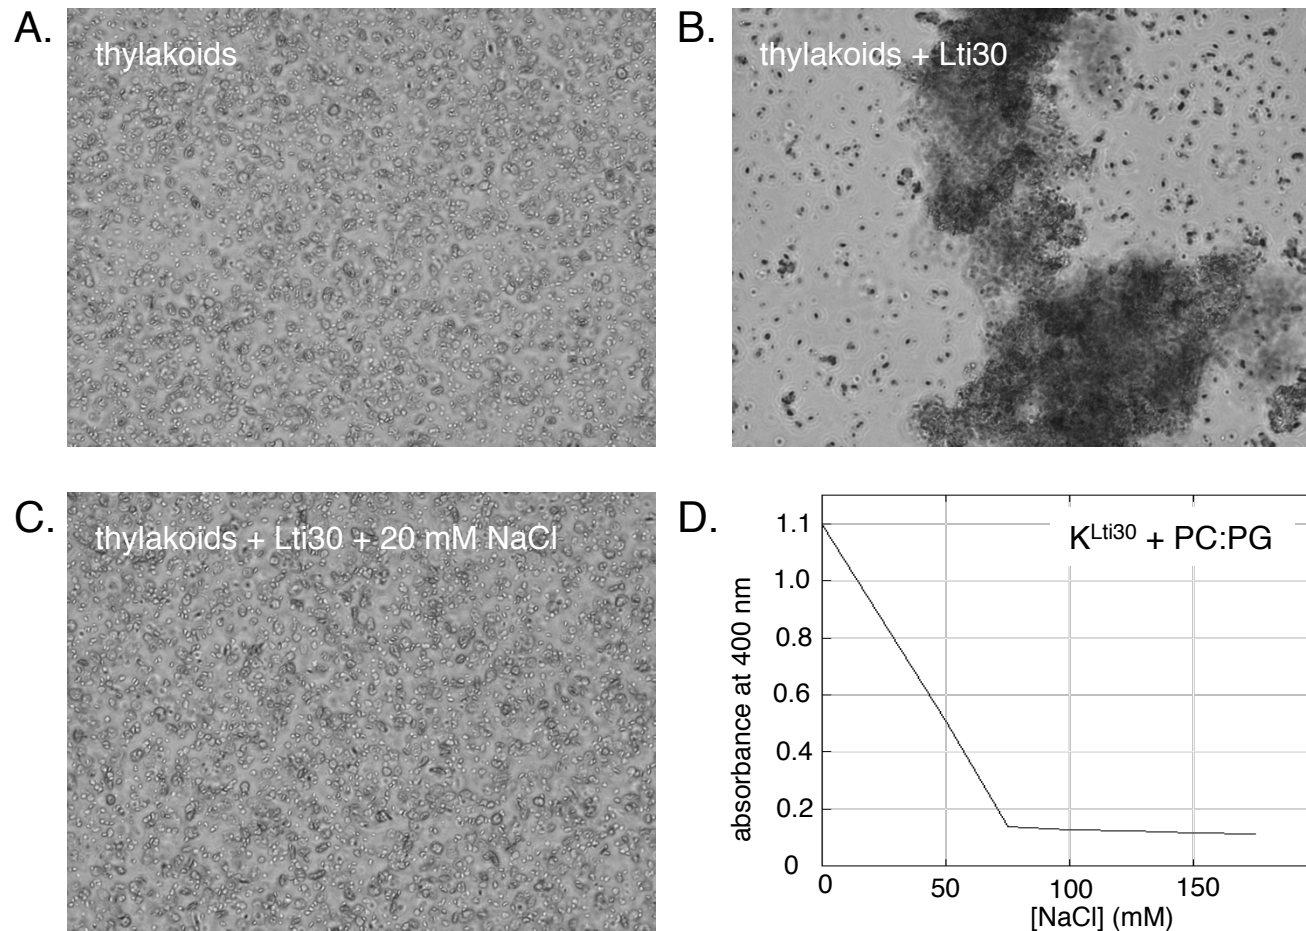

**Supplementary Figure 2.** Effects of NaCl on thylakoid and LUV clustering by Lti30 and  $K^{Lti30}$ .

**(A)** Light microscopy image of isolated thylakoid membranes (0.2mg/ml) from spinach. **(B)** Thylakoid membranes (0.2mg/ml) in Lti30 (0.2mg/ml). **(C)** Thylakoid membranes (0.2mg/ml) and Lti30 (0.2mg/ml), showing that clustering of Membranes can be reversed by 20 mM NaCl. **(D)** Clustering of LUVs (1.4 mM PC:PG 3:1 molar ratio in the presence of  $K^{Lti30}$  peptide (0.3 mg/ml) at pH 4.3 titrated with NaCl. Light scattering measured by absorbance at 400nm.
