# Supplementary material
Source: PubMed Central journal article supplement (PMC4902575)
Supplement: supp_pp.15.01531_PP2015-01531R2_Supplemental_Material_tbl.pdf [file supp_pp.15.01531_PP2015-01531R2_Supplemental_Material_tbl.pdf]

| dehydrin subfamilies | number of proteins | % net positively charged <sup>1.</sup> | % with added histidine protonation <sup>2.</sup> | % total, net positively charged <sup>3.</sup> |
|----------------------|--------------------|----------------------------------------|--------------------------------------------------|-----------------------------------------------|
| K                    | 17                 | 38%                                    | <b>62%</b>                                       | <b>100%</b>                                   |
| YSK                  | 7                  | <b>60%</b>                             | 40%                                              | <b>100%</b>                                   |
| YK                   | 7                  | 0%                                     | <b>86%</b>                                       | <b>86%</b>                                    |
| KS                   | 21                 | 14%                                    | <b>86%</b>                                       | <b>100%</b>                                   |
| SK                   | 16                 | 7%                                     | 47%                                              | <b>54%</b>                                    |
| Lea protein groups   |                    |                                        |                                                  |                                               |
| 1                    | 30                 | 7%                                     | 13%                                              | 20%                                           |
| 3A                   | 15                 | 47%                                    | 27%                                              | <b>74%</b>                                    |
| 3B                   | 14                 | 0%                                     | 28%                                              | 28%                                           |
| 4A                   | 13                 | 38%                                    | 38%                                              | <b>76%</b>                                    |
| 4B                   | 12                 | <b>75%</b>                             | 25%                                              | <b>100%</b>                                   |
| 6                    | 15                 | 0%                                     | 0%                                               | 0%                                            |
| 7                    | 14                 | 7%                                     | <b>78%</b>                                       | <b>85%</b>                                    |

<sup>1.</sup> Percentage of proteins with net positive charge as calculated from protein sequences?

<sup>2.</sup> Percentage of proteins with net positive charge including histidies as +1.

<sup>3.</sup> Sum of the percentages above, yielding a total estimate of proteins with vesicle-binding capacity according to data in this study.

**Supplementary Table 1.** Summary of positive net charge among LEA proteins. Protein sequence annotations from data in Battaglia et al., 2008. As a guide to the eye numbers larger than 50% are in bold.
